# Supplementary material for: Ozone sensitivity to varying greenhouse gases and ozone-depleting substances in CCMI-1 simulations
Source: Copernicus journal article supplement (doi:10.5194/acp-18-1091-2018), 2018-01-29
Supplement: Supplementary file [file acp-18-1091-2018-supplement.pdf]

Supplement of Atmos. Chem. Phys., 18, 1091–1114, 2018  
<https://doi.org/10.5194/acp-18-1091-2018-supplement>  
© Author(s) 2018. This work is distributed under  
the Creative Commons Attribution 4.0 License.

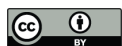

*Supplement of*

## **Ozone sensitivity to varying greenhouse gases and ozone-depleting substances in CCMI-1 simulations**

**Olaf Morgenstern et al.**

*Correspondence to:* Olaf Morgenstern (olaf.morgenstern@niwa.co.nz)

The copyright of individual parts of the supplement might differ from the CC BY 4.0 License.

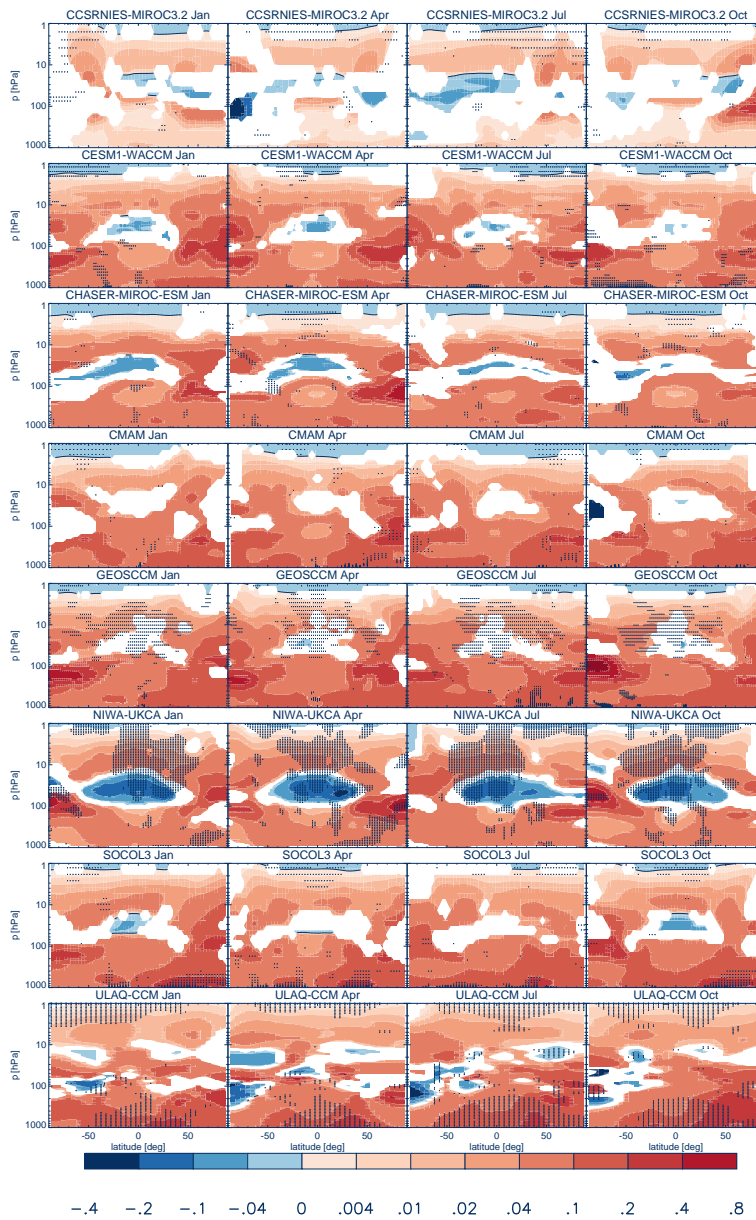

Figure S1: Same as figure 1, but based on ozone concentrations not mixing ratios, in units of  $10^{-18}$  molecules/cm<sup>3</sup>/ppbv (CH<sub>4</sub>). This depiction allows for an easier attribution of total-column changes to changes along the profile. Note the different vertical scale. Stippling denotes regions where the Durbin-Watson criterion (equation E5) is not satisfied.

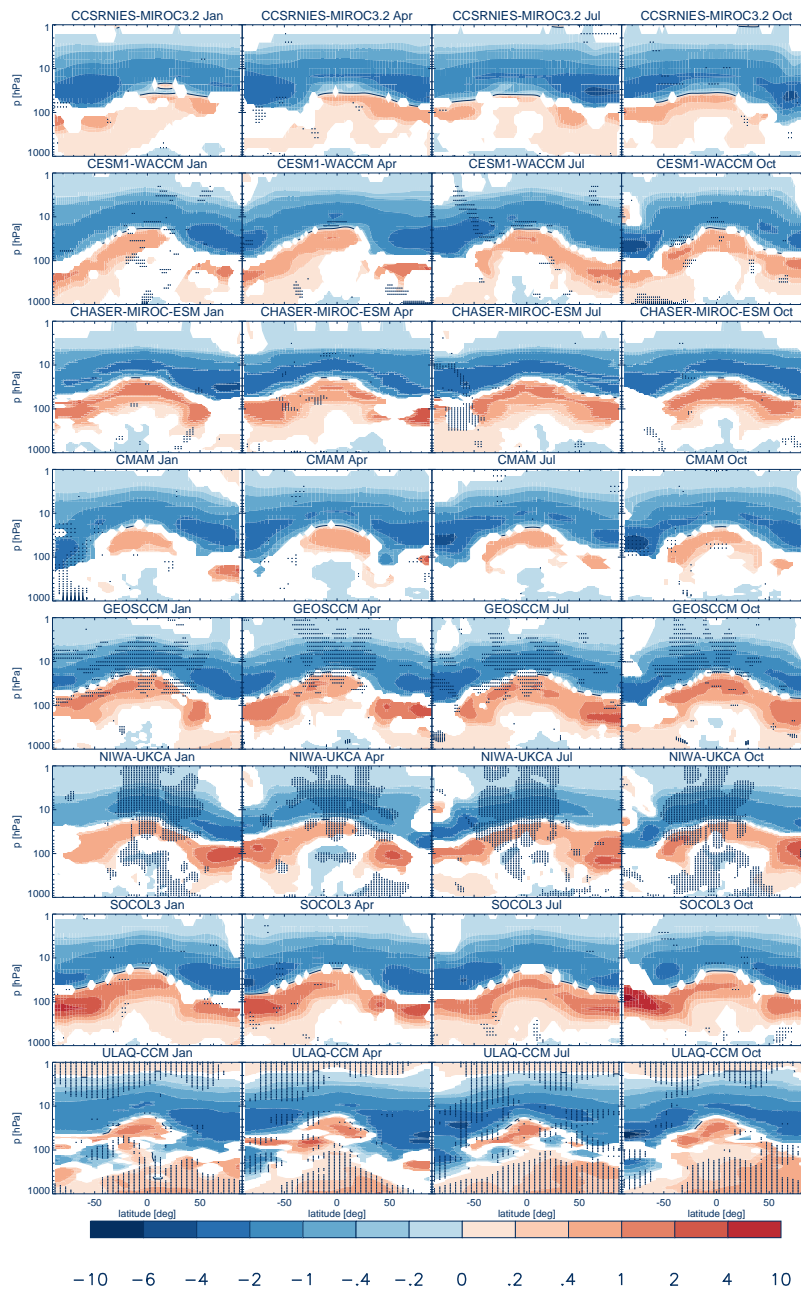

Figure S2: Same as figure 4, but in units of  $10^{-18}$  molecules/cm<sup>3</sup>/ppbv. Stippling denotes regions where the Durbin-Watson criterion is not satisfied.

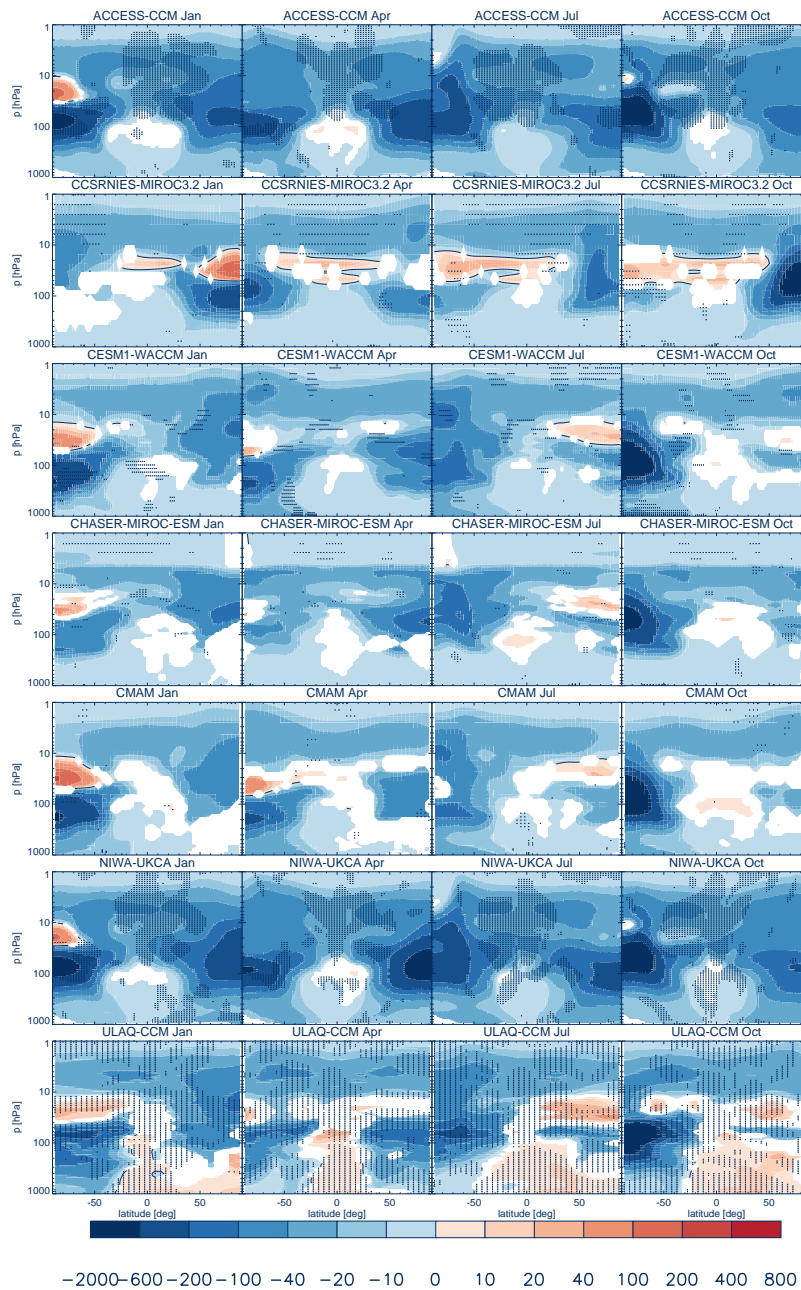

Figure S3: Same as figure 7, but in units of  $10^{-18}$  molecules/cm<sup>3</sup>/ppbv ( $Cl^{eq}$ ). Stippling denotes regions where the Durbin-Watson criterion is not satisfied.

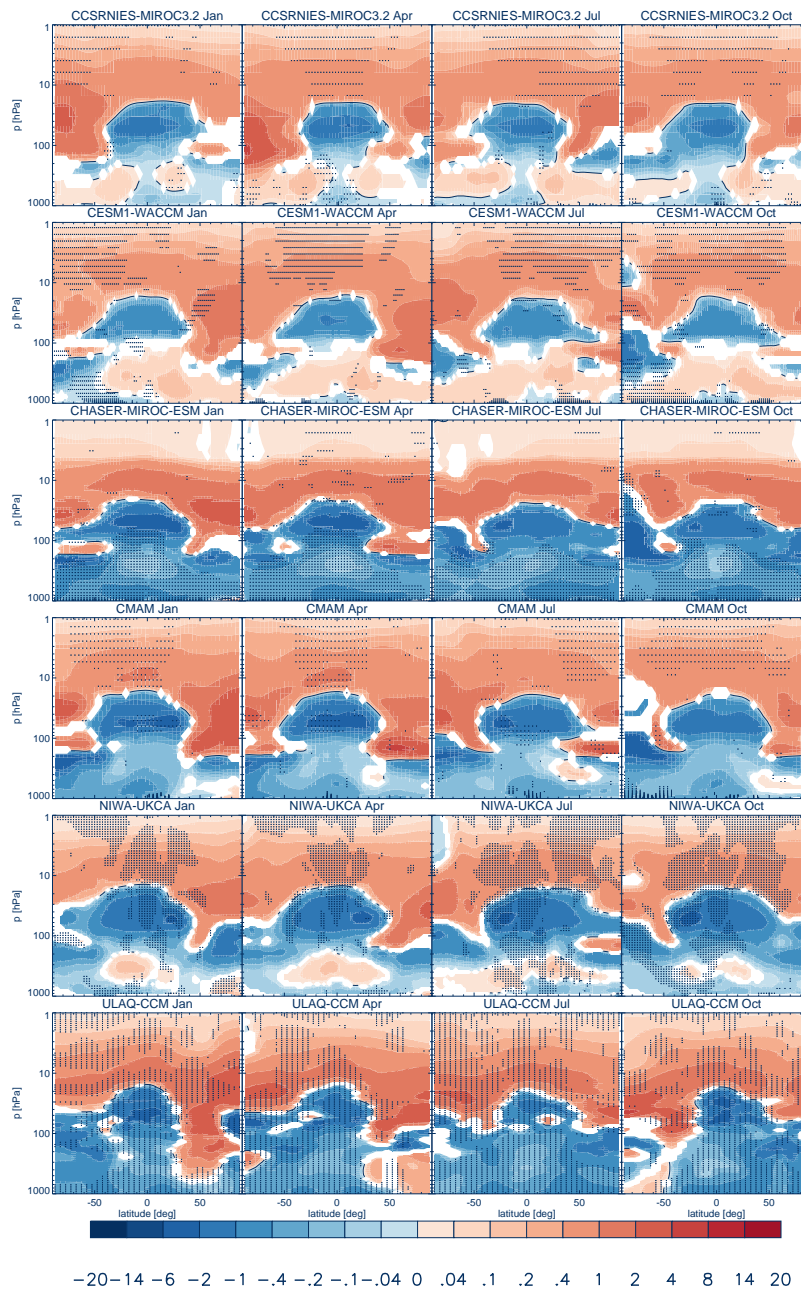

Figure S4: Same as figure 10, but in units of  $10^{-15}$  molecules/cm<sup>3</sup>/ppbv (CO<sub>2</sub>). Stippling denotes regions where the Durbin-Watson criterion is not satisfied.

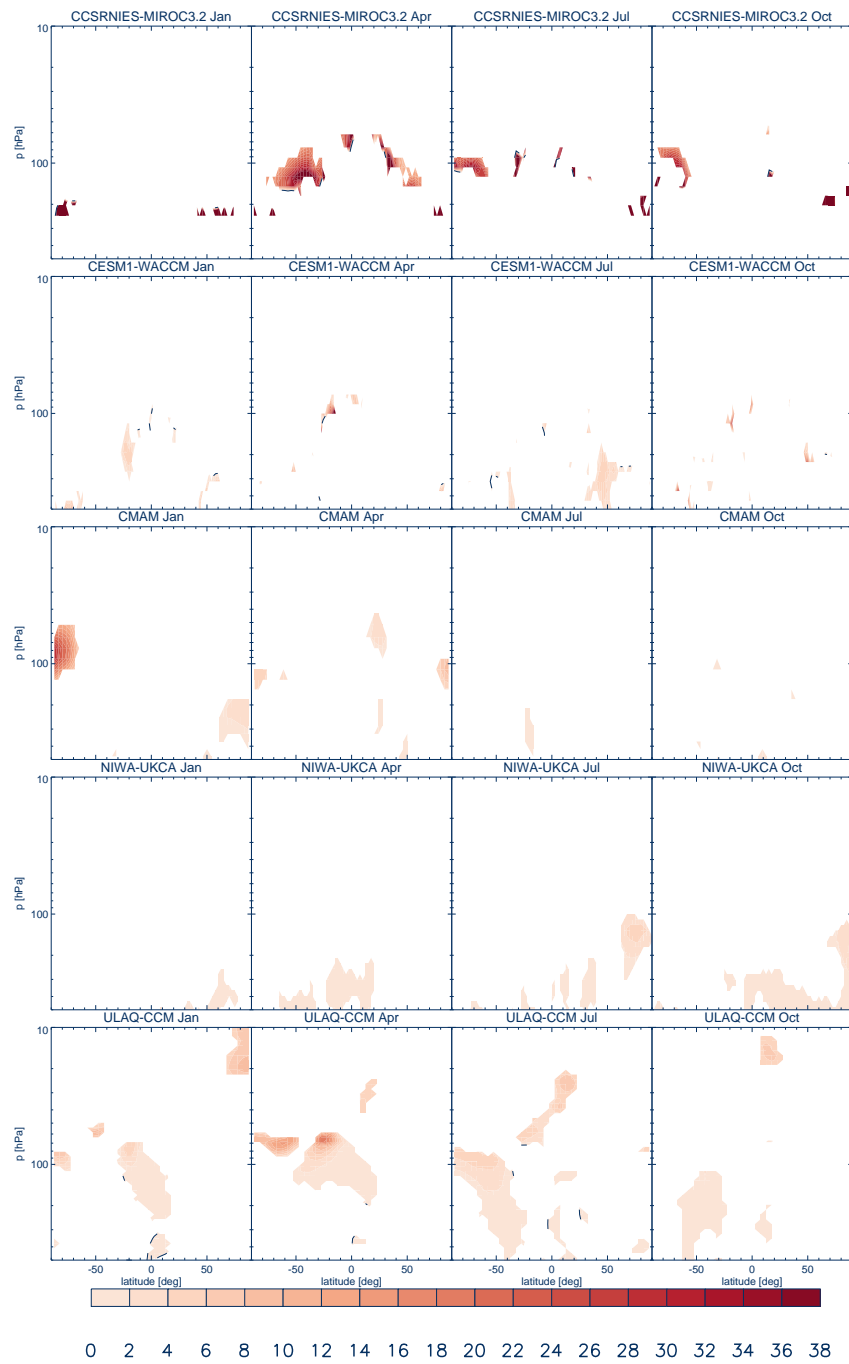

Figure S5: Ratio of stratospheric AOA increases to increases in surface  $N_2O$ , in  $10^{-4}$  years/ppbv.

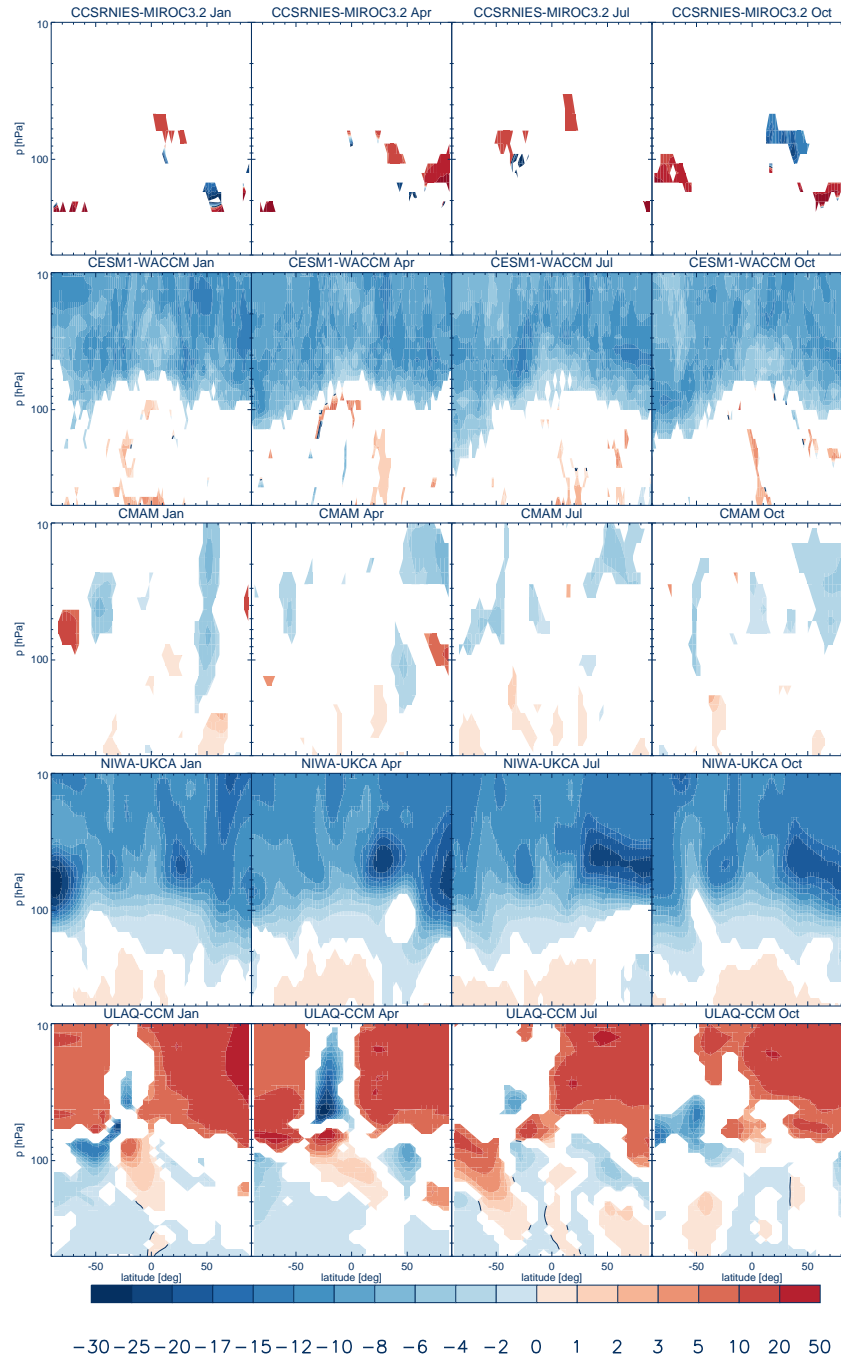

Figure S6: Same as figure S5, but for  $\text{CH}_4$ , in  $10^{-5}$  years/ppbv.

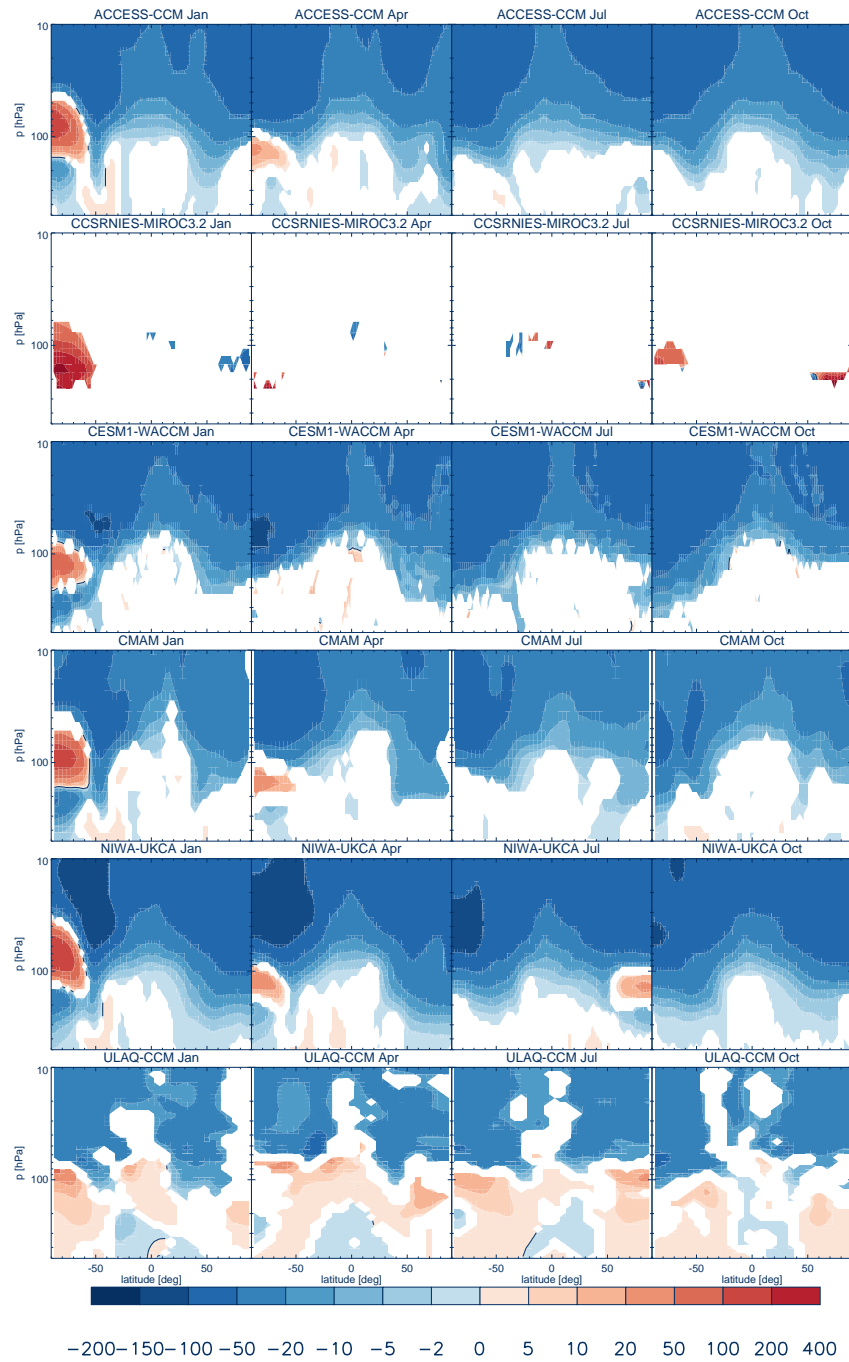

Figure S7: Same as figure S5, but for  $Cl^{eq}$ , in  $10^{-6}$  years/pptv.



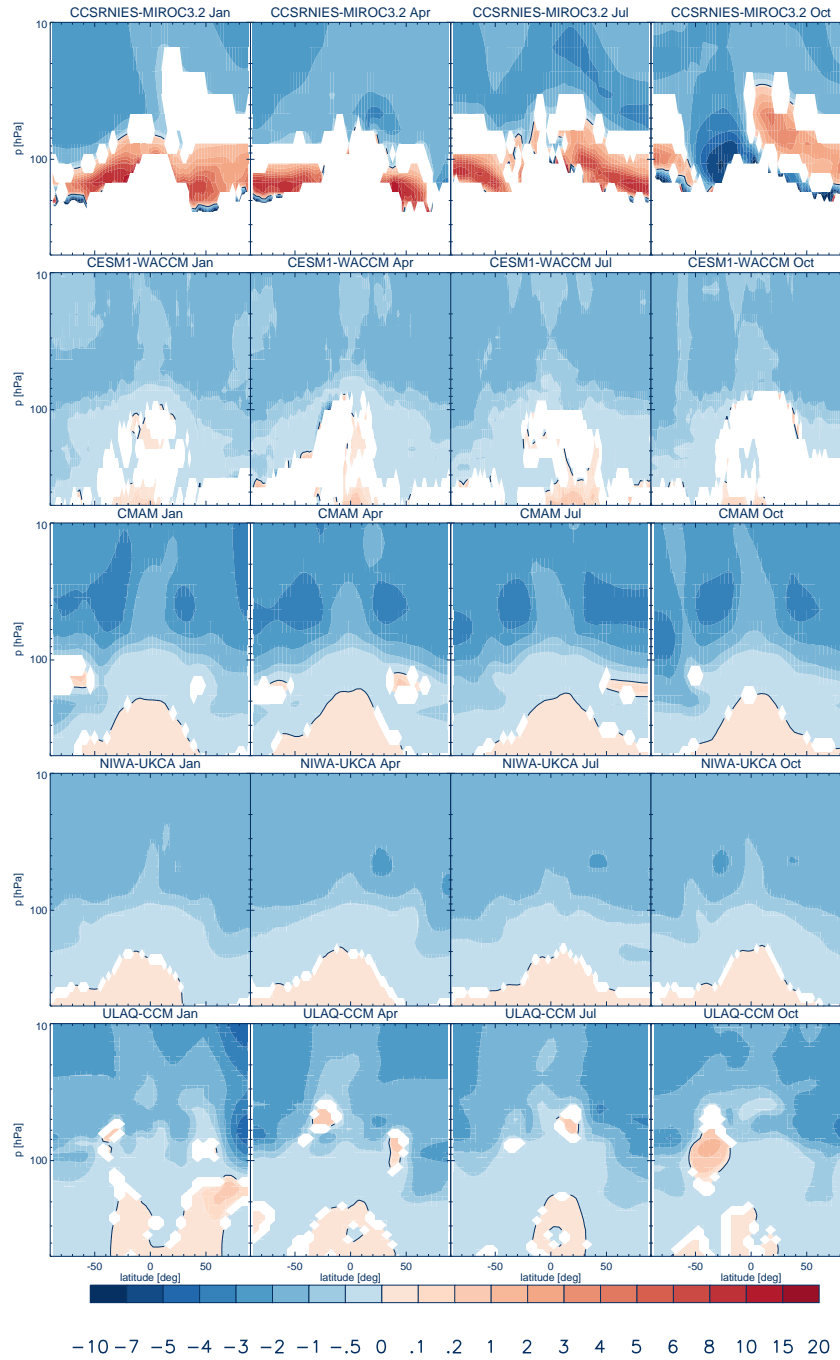

Figure S8: Same as figure S5, but for CO<sub>2</sub>, in 10<sup>-3</sup> years/ppmv.

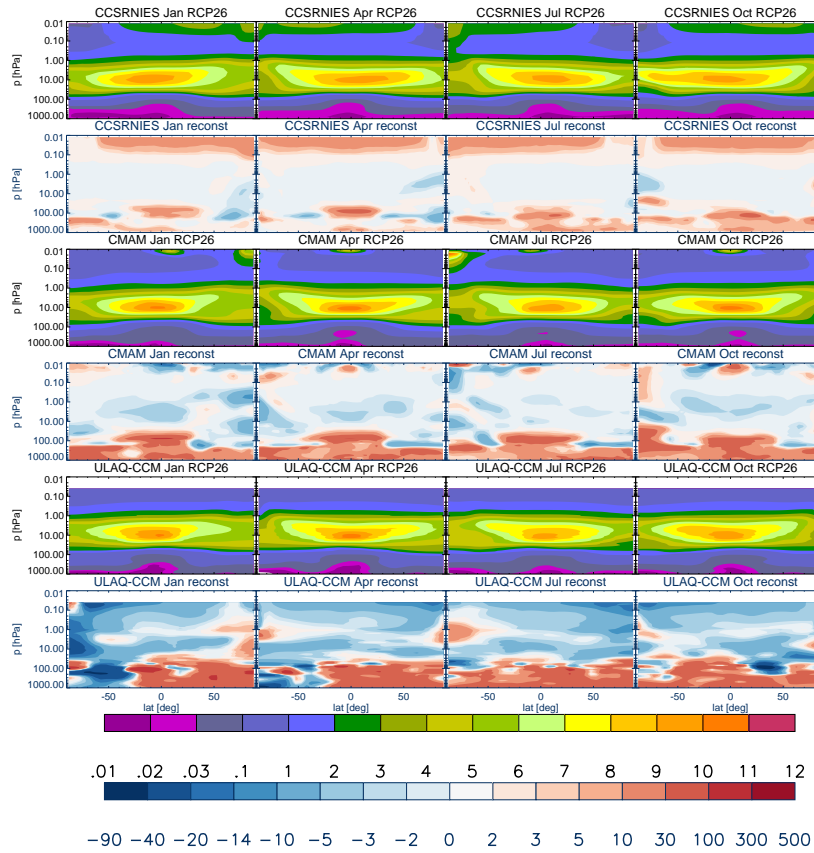

Figure S9: Same as figure 14 but for SEN-C2-RCP26.

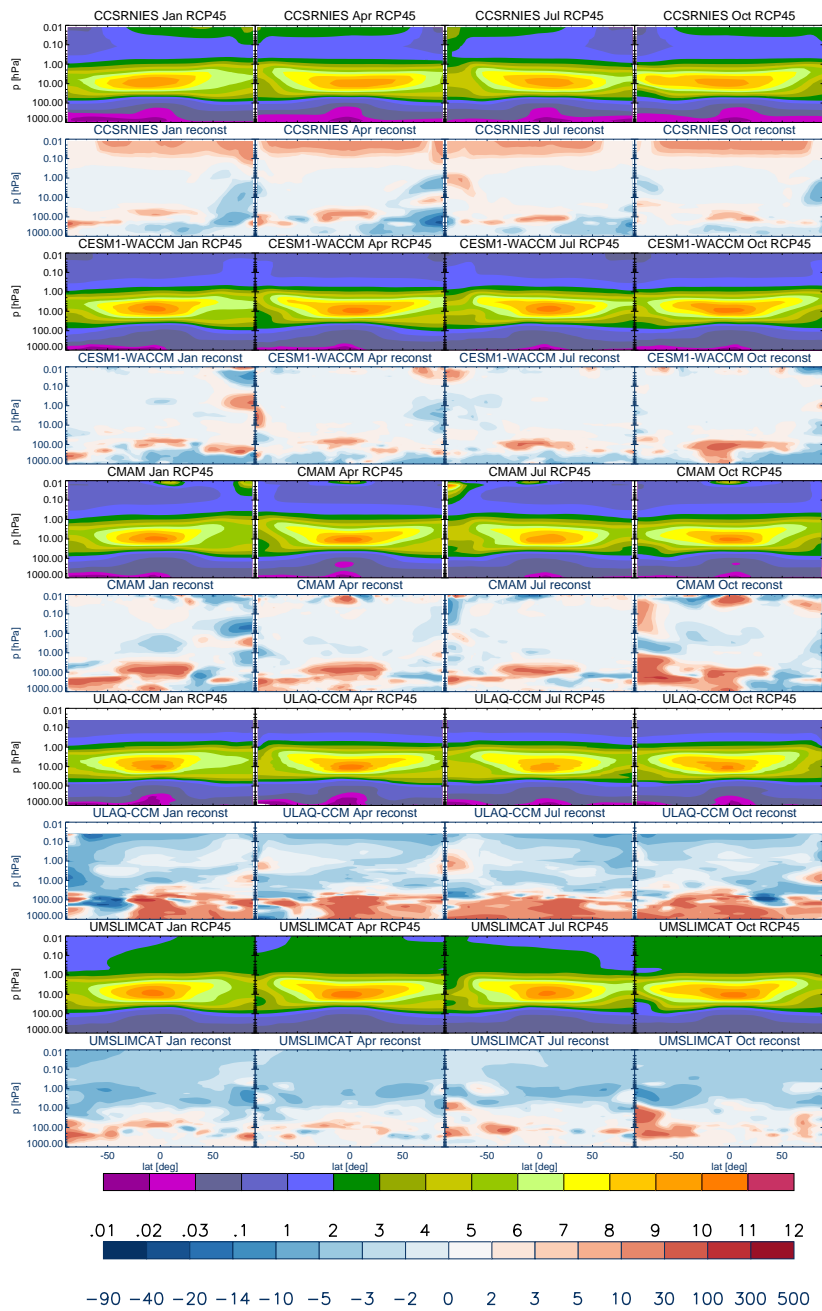

Figure S10: Same as figure 14 but for SEN-C2-RCP45.
